# Supplementary material for: Improvement of out-of-hospital cardiac arrest survival rate after implementation of the 2010 resuscitation guidelines
Source: PubMed Central journal article supplement (PMC6152955; doi:10.1371/journal.pone.0204169), 2018-09-24
Supplement: pone.0204169.s002.pdf [file pone.0204169.s002.pdf]

**S2 Table. Univariate logistic regression analysis of prognostic factors on survival at hospital discharge**

| Prognostic factors                                                | Not adjusted OR |                |                  |
|-------------------------------------------------------------------|-----------------|----------------|------------------|
|                                                                   | OR              | IC 95%         | P                |
| <b>Period</b>                                                     |                 |                |                  |
| <i>Period 1 (2009-2010)</i>                                       | (1) Ref.        |                |                  |
| <i>Period 2 (2011-2012)</i>                                       | <b>1.78</b>     | [1.17- 2.71]   | <b>0.007</b>     |
| <b>Age group</b>                                                  |                 |                |                  |
| <i>0-40 years</i>                                                 | (1) Ref.        |                |                  |
| <i>40-55 years</i>                                                | <b>1.40</b>     | [0.71- 2.75]   |                  |
| <i>55-70 years</i>                                                | <b>1.05</b>     | [0.55- 1.99]   |                  |
| <i>70-85 years</i>                                                | <b>0.41</b>     | [0.21- 0.83]   |                  |
| <i>&gt; 85 years</i>                                              | <b>0.10</b>     | [0.02- 0.47]   | <b>&lt;0.001</b> |
| <b>Gender</b>                                                     |                 |                |                  |
| <i>Female</i>                                                     | (1) Ref.        |                |                  |
| <i>Male</i>                                                       | <b>1.94</b>     | [0.18- 1.14]   | <b>0.007</b>     |
| <b>Pathogenesis (presumed aetiology)</b>                          |                 |                |                  |
| <i>Not documented aetiology</i>                                   | (1) Ref.        |                |                  |
| <i>Presumed traumatic aetiology, drowning and asphyxia</i>        | <b>1.45</b>     | [0.58- 3.62]   |                  |
| <i>Presumed medical (not cardiac) aetiology and drug overdose</i> | <b>2.94</b>     | [1.51- 5.71]   |                  |
| <i>Presumed cardiac aetiology</i>                                 | <b>13.07</b>    | [7.89- 21.65]  | <b>&lt;0.001</b> |
| <b>First monitored rhythm</b>                                     |                 |                |                  |
| <i>Asystole</i>                                                   | (1) Ref.        |                |                  |
| <i>PEA</i>                                                        | <b>5.58</b>     | [2.73- 11.41]  | <b>&lt;0.001</b> |
| <i>VF/VT</i>                                                      | <b>28.23</b>    | [14.38- 55.43] | <b>&lt;0.001</b> |
| <b>Arrest location</b>                                            |                 |                |                  |
| <i>Home</i>                                                       | (1) Ref.        |                |                  |
| <i>Public location</i>                                            | <b>3.93</b>     | [2.47- 6.27]   | <b>&lt;0.001</b> |
| <i>Ambulance</i>                                                  | <b>5.10</b>     | [2.83- 9.20]   | <b>&lt;0.001</b> |
| <b>Witnessed arrest</b>                                           |                 |                |                  |
| <i>Unwitnessed arrest</i>                                         | (1) Ref.        |                |                  |
| <i>Bystander or EMS witnessed</i>                                 | <b>4.72</b>     | [2.34- 9.51]   | <b>&lt;0.001</b> |
| <b>Bystander response</b>                                         |                 |                |                  |
| <i>Bystander CPR not performed</i>                                | (1) Ref.        |                |                  |
| <i>Bystander CPR performed</i>                                    | <b>2.74</b>     | [1.82-4.13]    | <b>&lt;0.001</b> |
| <b>Bystander AED use</b>                                          |                 |                |                  |
| <i>Automated external defibrillator (AED) not used</i>            | (1) Ref.        |                |                  |
| <i>Automated external defibrillator (AED) used</i>                | <b>5.73</b>     | [2.79- 11.75]  | <b>&lt;0.001</b> |
| <b>Response times</b>                                             |                 |                |                  |
| <i>0-2 min</i>                                                    | (1) Ref.        |                |                  |
| <i>2-6 min</i>                                                    | <b>0.80</b>     | [0.42-1.52]    |                  |
| <i>6-9 min</i>                                                    | <b>0.56</b>     | [0.33-0.96]    |                  |
| <i>9-12 min</i>                                                   | <b>0.31</b>     | [0.16-0.61]    |                  |
| <i>&gt; 12 min</i>                                                | <b>0.23</b>     | [0.10-0.54]    | <b>&lt;0.001</b> |

EMS: Emergency Medical System. PEA: Pulseless Electrical Activity.

VF/ VT: Ventricular Fibrillation/ Ventricular Tachycardia.

CPR: Cardiopulmonary Resuscitation. AED: Automated External Defibrillator.
